CORRECTION

# Correction: Species Identification of Food Contaminating Beetles by Recognizing Patterns in Microscopic Images of Elytra Fragments

Su Inn Park, Halil Bisgin, Hongjian Ding, Howard G. Semey, Darryl A. Langley, Weida Tong, Joshua Xu

There is an error in the current address for author Halil Bisgin. The current address should be: Department of Computer Science, Engineering and Physics, University of Michigan-Flint, Flint, Michigan, United States of America.

## Reference

1. Park SI, Bisgin H, Ding H, Semey HG, Langley DA, Tong W, et al. (2016) Species Identification of Food Contaminating Beetles by Recognizing Patterns in Microscopic Images of Elytra Fragments. PLoS ONE 11(6): e0157940. doi: [10.1371/journal.pone.0157940](https://doi.org/10.1371/journal.pone.0157940) PMID: [27341524](https://pubmed.ncbi.nlm.nih.gov/27341524/)

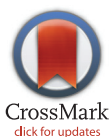

## OPEN ACCESS

**Citation:** Park SI, Bisgin H, Ding H, Semey HG, Langley DA, Tong W, et al. (2016) Correction: Species Identification of Food Contaminating Beetles by Recognizing Patterns in Microscopic Images of Elytra Fragments. PLoS ONE 11(9): e0162757. doi:10.1371/journal.pone.0162757

**Published:** September 7, 2016

**Copyright:** This is an open access article, free of all copyright, and may be freely reproduced, distributed, transmitted, modified, built upon, or otherwise used by anyone for any lawful purpose. The work is made available under the [Creative Commons CC0](https://creativecommons.org/licenses/by/4.0/) public domain dedication.
